# Supplementary material for: Structural Characteristics and Formation Mechanism of Microbiota Related to Fermentation Ability and Alcohol Production Ability in Nongxiang Daqu
Source: MDPI journal article supplement (doi:10.3390/foods11172602), 2022-08-27
Supplement: s1 [file s1]

# Supplementary Information:

**Table S1.** Functional community and environmental factor permutation test.

| permutation test | AFBM |        | AFFM |        | FFBM |        | FFFM |        |
|------------------|------|--------|------|--------|------|--------|------|--------|
|                  | r2   | Pr(>r) | r2   | Pr(>r) | r2   | Pr(>r) | r2   | Pr(>r) |
| temporary        | 0.24 | 0.04   | 0.83 | 0.01   | 0.08 | 0.43   | 0.75 | 0.01   |
| humidity         | 0.37 | 0.01   | 0.85 | 0.01   | 0.38 | 0.01   | 0.84 | 0.01   |
| O2               | 0.43 | 0.01   | 0.50 | 0.01   | 0.43 | 0.01   | 0.54 | 0.01   |
| Moisture         | 0.60 | 0.01   | 0.65 | 0.01   | 0.61 | 0.01   | 0.67 | 0.01   |
| acidity          | 0.45 | 0.01   | 0.78 | 0.01   | 0.43 | 0.01   | 0.79 | 0.01   |

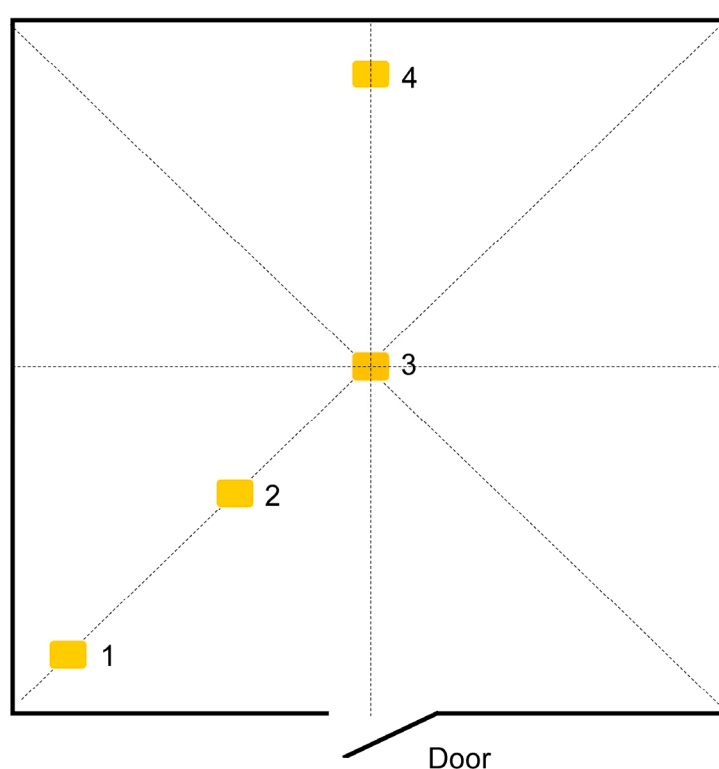

**Figure S1.** Sampling points of Daqu in the Qu-room.

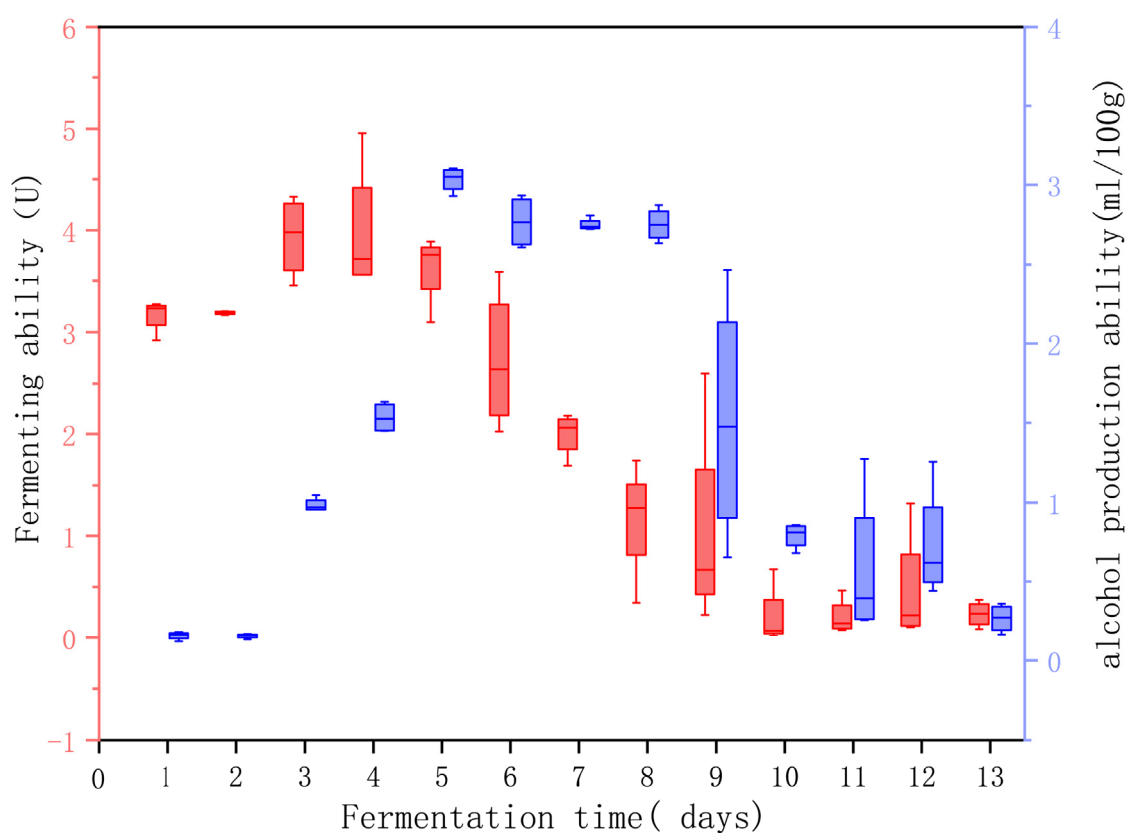

**Figure S2.** Variations in the fermentation ability and alcohol production ability. Red represents fermentation ability, blue represents alcohol production ability.

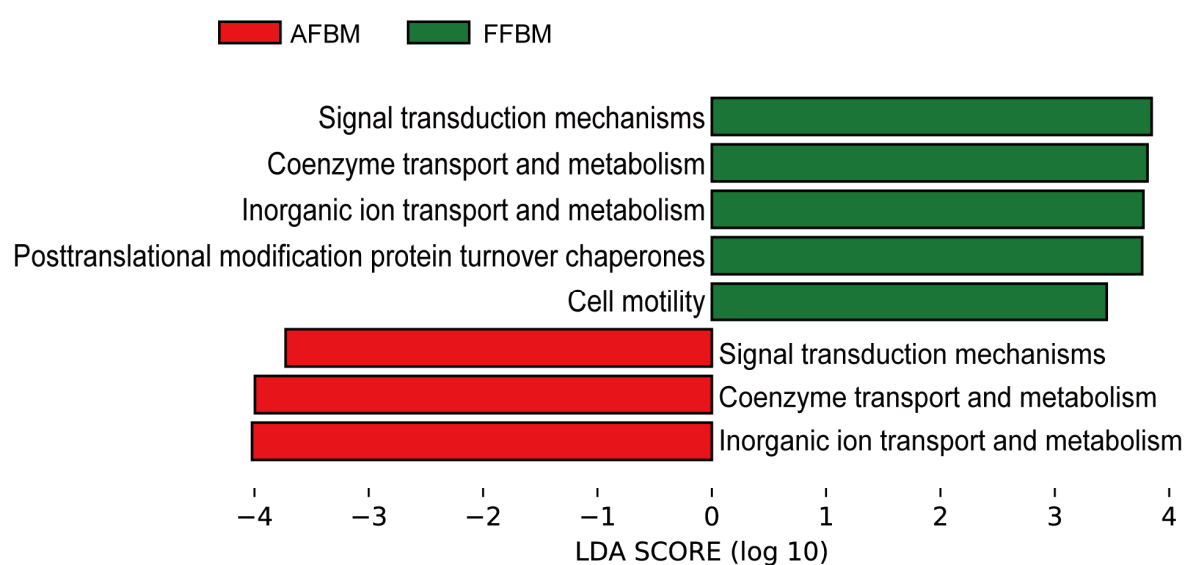

**Figure S3.** Functional differences between FFBM and AFBM. Red represents the differential metabolic pathways in AFBM, green represents the differential metabolic pathways in FFBM. (Function prediction based on COG).
